# Supplementary material for: A systematic characterization of factors that regulate Drosophila segmentation via a bacterial one-hybrid system
Source: PubMed Central journal article supplement — Nucleic Acids Res. 2008 Mar 10;36(8):2547–60. doi: 10.1093/nar/gkn048 (PMC2377422; doi:10.1093/nar/gkn048), 2008-03-10
Supplement: nar_gkn048_2.pdf [file nar_gkn048_2.pdf]

## Supplementary Table 2.

Position Weight Matrices (PMWs) used in Genome Surveyor. All of these PMWs were generated from B1H binding site data with the exception of Dstat.old (Yan et al. Cell 84, 1996 p421) and Ftz\_f1.new (Ueda et al. Nucl. Acids Res. 19, 1991 p3689). Each row lists the base frequency from 5' to 3' in each site with the columns corresponding to A,C,G & T respectively. Additional homeodomain specificities will be described elsewhere (Noyes, Christensen, Wakabayashi, Stormo, Brodsky and Wolfe *manuscript in preparation*)

```
>bicoid.new.5 7
2 9 2 9
4 2 0 16
21 0 0 1
22 0 0 0
1 0 7 14
0 20 0 2
0 9 0 13
<
>caudal.new.4 7
3 2 3 30
1 0 0 37
8 0 2 28
37 0 1 0
3 0 0 35
3 0 9 26
18 0 19 1
<
>Dstat.old 9 PSEUDO_COUNT 1.0
0 0 0 30
0 0 0 30
0 30 0 0
2 21 4 3
4 14 11 1
3 4 20 3
0 0 30 0
30 0 0 0
30 0 0 0
<
>knirps.new.1 12
19 1 2 4
25 1 0 0
16 0 0 10
5 9 6 6
0 4 1 21
21 0 5 0
0 0 26 0
17 0 8 1
1 3 18 4
0 26 0 0
```

```
25  0  1  0
5   12 7  2
<
>kruppel.new.4 11
3   17  5  6
11  4  10 6
24  0  7  0
30  0  0  1
18  6  7  0
0   0  31 0
2   0  29 0
2   0  29 0
0   1  7  23
4   0  5  22
20  4  3  4
```

```
<
>tailless.new.1 10
20  4  4  5
29  0  4  0
33  0  0  0
31  1  1  0
0   0  33 0
0   2  0  31
0   33 0  0
33  0  0  0
31  0  1  1
17  10 2  4
```

```
<
>giant.new.5 10
28  5  25 2
0   0  0  60
1   1  3  55
54  0  6  0
0   53 0  7
7   0  53 0
0   6  0  54
55  3  1  1
60  0  0  0
2   25 5  28
```

```
<
>hunchback.new.4.8 8
21  5  0  0
26  0  0  0
26  0  0  0
26  0  0  0
26  0  0  0
26  0  0  0
26  0  0  0
```

```
2    19    0    5
<
>slp1.new.1    11
8     3    14   16
0     0     0   41
3     0    38    0
0     0     0   41
0     0     1   40
0     0     2   39
27    0     4   10
1    22     7   11
17    8    15    1
4    13     3   21
15    3     4   19
```

```
<
>nubbin.new.1  12
2     1     1   25
29    0     0    0
0     0     0   29
0     0    25    4
0    19     1    9
24    0     0    5
28    0     1    0
28    0     0    1
4     1     0   24
6     5     8   10
19    5     1    4
4     3    15    7
```

```
<
>dichaete.new.5    11
1     8     7   13
0    25     0    4
0    17     0   12
20   0     0    9
0     0     0   29
0     0     3   26
2     0    27    0
0     0     0   29
1     2     4   22
4    10     6    9
6     1     1   21
```

```
<
>hkb.new.1    9
3     0    18   11
8     0    24    0
0     0    32    0
0     0    32    0
0    32     0    0
```

|    |   |    |    |
|----|---|----|----|
| 0  | 0 | 32 | 0  |
| 0  | 0 | 3  | 29 |
| 0  | 0 | 31 | 1  |
| 24 | 3 | 2  | 3  |

<

>btd.new.6 10

|    |    |    |    |
|----|----|----|----|
| 14 | 3  | 7  | 6  |
| 10 | 0  | 20 | 0  |
| 4  | 0  | 18 | 8  |
| 2  | 0  | 28 | 0  |
| 0  | 0  | 30 | 0  |
| 0  | 0  | 30 | 0  |
| 2  | 28 | 0  | 0  |
| 0  | 0  | 30 | 0  |
| 0  | 0  | 20 | 10 |
| 15 | 1  | 10 | 4  |

<

>eve.new.6 6

|    |   |    |    |
|----|---|----|----|
| 1  | 0 | 0  | 21 |
| 22 | 0 | 0  | 0  |
| 22 | 0 | 0  | 0  |
| 0  | 2 | 1  | 19 |
| 0  | 2 | 11 | 9  |
| 17 | 0 | 4  | 1  |

<

>fkh.new.6 11

|    |    |    |    |
|----|----|----|----|
| 3  | 0  | 0  | 24 |
| 5  | 0  | 22 | 0  |
| 0  | 0  | 0  | 27 |
| 0  | 0  | 0  | 27 |
| 0  | 0  | 1  | 26 |
| 13 | 0  | 14 | 0  |
| 4  | 13 | 2  | 8  |
| 6  | 7  | 3  | 11 |
| 0  | 11 | 2  | 14 |
| 23 | 0  | 1  | 3  |
| 15 | 4  | 4  | 4  |

<

>ftz-f1.new.6 13

|   |   |   |   |
|---|---|---|---|
| 0 | 6 | 1 | 2 |
| 0 | 7 | 2 | 0 |
| 9 | 0 | 0 | 0 |
| 9 | 0 | 0 | 0 |
| 0 | 0 | 9 | 0 |
| 0 | 0 | 9 | 0 |
| 5 | 1 | 0 | 3 |
| 0 | 8 | 0 | 1 |
| 6 | 0 | 3 | 0 |

```
1 7 0 1
2 5 0 2
2 0 6 1
3 5 1 0
```

<

```
>ftz.new.6 6
1 0 0 17
18 0 0 0
18 0 0 0
0 0 0 18
0 0 9 9
14 0 4 0
```

<

```
>hairy.new.6 10 PSEUDO_COUNT 0
0.000000 0.027778 0.972222 0.000000
0.083333 0.194444 0.527778 0.194444
0.000000 1.000000 0.000000 0.000000
0.694444 0.000000 0.305556 0.000000
0.000000 0.972221 0.000000 0.027776
0.027777 0.000000 0.972222 0.000000
0.000000 0.305555 0.000000 0.694443
0.000000 0.000000 0.999999 0.000000
0.194443 0.527777 0.194443 0.083332
0.000000 0.972221 0.027777 0.000000
```

<

```
>odd.new.6 11
7 5 0 3
10 5 0 0
0 14 1 0
12 0 3 0
0 0 15 0
0 0 0 15
15 0 0 0
0 0 15 0
0 15 0 0
11 3 1 0
5 4 6 0
```

<

```
>opa.new.6 12
0 1 15 2
10 7 1 0
1 16 0 1
1 15 1 1
0 16 1 1
0 18 0 0
0 18 0 0
0 14 0 4
4 0 13 1
```

```
0    14    2    2
3    1     4   10
2    0    16    0
<
>prd.new.6    11
5     6     4   15
3    14     4    9
8    16     3    3
0     1    25    4
4     0     0   26
0    27     0    3
28    1     0    1
0    30     0    0
2     0    28    0
0    18    12    0
5     8     0   17
<
>run.new.6     9
0     9     0   22
1     0     0   30
0     0    31    0
0    23     1    7
0     1    30    0
0     0    31    0
0     2     0   29
1     2     0   28
15    0     3   13
<
>ttk.new.6     9
10    8     3    1
22    0     0    0
0     0    22    0
0     0    22    0
22    0     0    0
0     5     0   17
21    0     0    1
22    0     0    0
1     5     3   13
<
>AbdB         7
1     0     0   20
0     0     0   21
5     0     0   16
21    0     0    0
0     3     0   18
3     0    11    7
13    0     5    3
<
```

>Cad 7  
3 3 3 29  
4 0 0 34  
12 0 2 24  
38 0 0 0  
0 0 0 38  
4 0 7 27  
22 0 15 1

<

>Abd-A 7  
1 3 0 14  
0 0 0 18  
16 0 0 2  
18 0 0 0  
1 0 0 17  
0 0 6 12  
15 1 2 0

<

>Antp 7  
1 1 0 14  
0 0 0 16  
16 0 0 0  
16 0 0 0  
0 0 0 16  
0 0 9 7  
15 0 1 0

<

>Dfd 7  
1 4 3 16  
0 0 0 24  
24 0 0 0  
24 0 0 0  
0 0 0 24  
1 0 19 4  
21 0 3 0

<

>Eve 7  
3 10 0 9  
1 0 0 21  
22 0 0 0  
22 0 0 0  
0 2 1 19  
0 2 11 9  
17 0 4 1

<

>Ftz 7  
1 2 0 15  
1 0 0 17

|      |    |    |    |
|------|----|----|----|
| 18   | 0  | 0  | 0  |
| 18   | 0  | 0  | 0  |
| 0    | 0  | 0  | 18 |
| 0    | 0  | 9  | 9  |
| 14   | 0  | 4  | 0  |
| <    |    |    |    |
| >Lab | 7  |    |    |
| 1    | 3  | 0  | 12 |
| 0    | 0  | 0  | 16 |
| 16   | 0  | 0  | 0  |
| 16   | 0  | 0  | 0  |
| 1    | 0  | 0  | 15 |
| 0    | 0  | 6  | 10 |
| 16   | 0  | 0  | 0  |
| <    |    |    |    |
| >Pb  | 7  |    |    |
| 4    | 9  | 0  | 11 |
| 0    | 0  | 0  | 24 |
| 24   | 0  | 0  | 0  |
| 24   | 0  | 0  | 0  |
| 0    | 0  | 0  | 24 |
| 0    | 0  | 11 | 13 |
| 24   | 0  | 0  | 0  |
| <    |    |    |    |
| >Scr | 7  |    |    |
| 3    | 7  | 0  | 15 |
| 0    | 0  | 0  | 25 |
| 25   | 0  | 0  | 0  |
| 25   | 0  | 0  | 0  |
| 0    | 0  | 0  | 25 |
| 0    | 0  | 18 | 7  |
| 23   | 0  | 2  | 0  |
| <    |    |    |    |
| >Ubx | 7  |    |    |
| 0    | 0  | 0  | 20 |
| 0    | 0  | 0  | 20 |
| 17   | 0  | 0  | 3  |
| 20   | 0  | 0  | 0  |
| 0    | 0  | 0  | 20 |
| 0    | 0  | 6  | 14 |
| 14   | 0  | 6  | 0  |
| <    |    |    |    |
| >Bcd | 6  |    |    |
| 0    | 0  | 0  | 22 |
| 20   | 0  | 0  | 2  |
| 22   | 0  | 0  | 0  |
| 0    | 0  | 1  | 21 |
| 0    | 22 | 0  | 0  |



|        |    |    |    |
|--------|----|----|----|
| 0      | 21 | 0  | 1  |
| <      |    |    |    |
| >Gsc   | 6  |    |    |
| 0      | 0  | 0  | 22 |
| 22     | 0  | 0  | 0  |
| 22     | 0  | 0  | 0  |
| 0      | 0  | 0  | 22 |
| 0      | 22 | 0  | 0  |
| 0      | 14 | 2  | 6  |
| <      |    |    |    |
| >Oc    | 6  |    |    |
| 0      | 0  | 0  | 19 |
| 19     | 0  | 0  | 0  |
| 19     | 0  | 0  | 0  |
| 0      | 0  | 2  | 17 |
| 0      | 19 | 0  | 0  |
| 0      | 17 | 1  | 1  |
| <      |    |    |    |
| >Ems   | 7  |    |    |
| 3      | 7  | 1  | 9  |
| 3      | 0  | 0  | 17 |
| 19     | 0  | 0  | 1  |
| 19     | 0  | 1  | 0  |
| 0      | 0  | 0  | 20 |
| 0      | 1  | 10 | 9  |
| 14     | 0  | 6  | 0  |
| <      |    |    |    |
| >En    | 7  |    |    |
| 2      | 8  | 2  | 11 |
| 0      | 0  | 0  | 23 |
| 23     | 0  | 0  | 0  |
| 23     | 0  | 0  | 0  |
| 0      | 0  | 0  | 23 |
| 0      | 0  | 2  | 21 |
| 13     | 0  | 10 | 0  |
| <      |    |    |    |
| >Inv   | 7  |    |    |
| 1      | 9  | 0  | 6  |
| 0      | 0  | 0  | 16 |
| 16     | 0  | 0  | 0  |
| 16     | 0  | 0  | 0  |
| 0      | 0  | 0  | 16 |
| 0      | 0  | 0  | 16 |
| 11     | 0  | 5  | 0  |
| <      |    |    |    |
| >Optix | 5  |    |    |
| 0      | 5  | 0  | 22 |
| 0      | 0  | 27 | 0  |

|    |   |   |    |
|----|---|---|----|
| 27 | 0 | 0 | 0  |
| 0  | 0 | 0 | 27 |
| 26 | 0 | 1 | 0  |
| <  |   |   |    |
